# Supplementary material
Source: HighWire-hosted journal article supplement (https://www.cfp.ca/highwire/filestream/34512/field_highwire_adjunct_files/2/e194_Appendix_3_Characteristics_of_RCTs.pdf)
Supplement: e194_Appendix_3_Characteristics_of_RCTs.pdf [file e194_Appendix_3_Characteristics_of_RCTs.pdf]

Appendix 3. Characteristics of Included Randomized, Controlled, Trials\*

| RCT                | Topic           | Intervention                                                      | Comparator                                                              | Number of Patients Randomized | JADAD Score |
|--------------------|-----------------|-------------------------------------------------------------------|-------------------------------------------------------------------------|-------------------------------|-------------|
| Carrieri 2014      | Primary Care    | Methadone maintenance therapy induction in Primary Care           | Methadone maintenance therapy induction in Specialty Care               | 221                           | 2           |
| Fiellin 2001       | Primary Care    | Methadone maintenance therapy delivered by primary care physician | Methadone maintenance therapy delivered by a narcotic treatment program | 46                            | 3           |
| Gibson 2003**      | Primary Care    | Buprenorphine in primary care                                     | Buprenorphine in specialty care                                         | 115                           | 2           |
| O'Connor 1998      | Primary Care    | Buprenorphine delivered through primary care                      | Buprenorphine delivered in traditional drug treatment program           | 46                            | 2           |
| Rosenthal 2013**   | Pharmacotherapy | Buprenorphine-naloxone                                            | Placebo                                                                 | 287                           | 3           |
| Dunlop 2017*       | Pharmacotherapy | Buprenorphine-naloxone                                            | Waitlist                                                                | 50                            | 3           |
| Sigmon 2016*       | Pharmacotherapy | Buprenorphine-naloxone                                            | Waitlist                                                                | 50                            | 1           |
| Wilson 2010*       | Pharmacotherapy | Methadone                                                         | Waitlist                                                                | 319                           | 3           |
| Piralishvili 2015* | Pharmacotherapy | Buprenorphine-naloxone                                            | Methadone                                                               | 80                            | 3           |
| Neumann 2013*      | Pharmacotherapy | Buprenorphine-naloxone                                            | Methadone                                                               | 54                            | 2           |
| Potter 2013*       | Pharmacotherapy | Buprenorphine-naloxone                                            | Methadone                                                               | 1269                          | 2           |
| Coviello 2010*     | Pharmacotherapy | Oral naltrexone                                                   | Treatment as usual                                                      | 111                           | 1           |
| Krupitsky 2012*    | Pharmacotherapy | Oral naltrexone+ Placebo implant                                  | Placebo oral naltrexone + placebo implant                               | 306                           | 4           |

|                 |                                      |                                                                                        |                                                 |     |   |
|-----------------|--------------------------------------|----------------------------------------------------------------------------------------|-------------------------------------------------|-----|---|
| Krupitsky 2013* | Pharmacotherapy                      | Oral naltrexone+<br>Placebo guanfacine                                                 | Placebo oral naltrexone +<br>placebo guanfacine | 301 | 4 |
| Mokri 2016*     | Pharmacotherapy                      | Oral naltrexone                                                                        | Buprenorphine/naloxone                          | 129 | 5 |
| Springer 2018*  | Pharmacotherapy                      | Injectable naltrexone                                                                  | Placebo                                         | 93  | 4 |
| Bisaga 2015*    | Pharmacotherapy<br>(Cannabinoids)    | Dronabinol                                                                             | Placebo                                         | 60  | 3 |
| Blondell 2010   | Tapering<br>(Duration of<br>Therapy) | Buprenorphine-naloxone<br>taper                                                        | Buprenorphine-naloxone<br>stable                | 12  | 3 |
| Fiellin 2014**  | Tapering<br>(Duration of<br>Therapy) | Buprenorphine-naloxone<br>taper                                                        | Buprenorphine-naloxone<br>stable                | 113 | 3 |
| Sees 2000**     | Tapering<br>(Duration of<br>Therapy) | Methadone taper                                                                        | Methadone stable                                | 179 | 3 |
| Marsch 2016     | Tapering<br>(Duration of<br>Therapy) | Buprenorphine-naloxone<br>28-day taper                                                 | Buprenorphine-naloxone<br>56-day taper          | 53  | 4 |
| Ling 2009       | Tapering<br>(Duration of<br>Therapy) | Buprenorphine-naloxone<br>7-day taper                                                  | Buprenorphine-naloxone<br>28-day taper          | 516 | 2 |
| Sigmon 2013     | Tapering<br>(Duration of<br>Therapy) | Buprenorphine-naloxone<br>1-week taper<br>or<br>Buprenorphine-naloxone<br>2-week taper | Buprenorphine-naloxone<br>4-week taper          | 70  | 4 |
| Abbott 1998     | Psychosocial                         | Community<br>Reinforcement Approach                                                    | Standard Care                                   | 180 | 2 |
| Chawarski 2011  | Psychosocial                         | Counseling + Methadone<br>maintenance therapy                                          | Methadone maintenance<br>therapy                | 37  | 2 |

|                |              |                                                              |                                                     |      |   |
|----------------|--------------|--------------------------------------------------------------|-----------------------------------------------------|------|---|
| Fiellin 2006   | Psychosocial | Enhanced Medical Management (45-minute counseling sessions)  | Standard Management (20-minute sessions)            | 166  | 3 |
| Gu 2013        | Psychosocial | Counseling + Methadone maintenance therapy                   | Methadone maintenance therapy                       | 288  | 2 |
| Liu 2018*      | Psychosocial | Counseling + Methadone maintenance therapy                   | Methadone maintenance therapy                       | 125  | 3 |
| Tetrault 2012  | Psychosocial | Enhanced Medical Management (45-minute counseling sessions)  | Standard Management (15-minute counseling sessions) | 47   | 2 |
| Weiss 2011     | Psychosocial | Counseling (45-60 minutes)                                   | Standard Management (15-20 minutes)                 | 653  | 3 |
| Bernstein 2005 | Psychosocial | Motivational Interviewing                                    | Standard Care                                       | 1175 | 5 |
| Jaffray 2014   | Psychosocial | Motivational Interviewing                                    | Standard Care                                       | 542  | 2 |
| Saunders 1995  | Psychosocial | Motivational Interviewing                                    | Education                                           | 122  | 0 |
| Stein 2009     | Psychosocial | Motivational Interviewing                                    | Assessment                                          | 277  | 1 |
| Abrahms 1979   | Psychosocial | Cognitive Behavioral Therapy                                 | Group Therapy                                       | 14   | 1 |
| Fiellin 2013   | Psychosocial | Physician Management + Cognitive Behavioral Therapy          | Physician Management                                | 141  | 3 |
| Ling 2013      | Psychosocial | Cognitive Behavioral Therapy                                 | No Behavioral Therapy                               | 104  | 3 |
| Pan 2015*      | Psychosocial | Cognitive Behavioral Therapy + Methadone maintenance therapy | Methadone maintenance therapy                       | 240  | 3 |

|                |              |                                                                    |                                                   |     |   |
|----------------|--------------|--------------------------------------------------------------------|---------------------------------------------------|-----|---|
| Scherbaum 2005 | Psychosocial | Methadone Maintenance Therapy + Group Cognitive Behavioral Therapy | Methadone maintenance therapy                     | 73  | 3 |
| Abbott 1998    | Psychosocial | Methadone + Contingency Management                                 | Methadone with Standard Counseling                | 166 | 2 |
| Bickel 2008    | Psychosocial | Contingency Management                                             | Standard counseling                               | 135 | 2 |
| Brooner 2004   | Psychosocial | Motivated Stepped Care                                             | Standard Stepped Care                             | 127 | 1 |
| Chen 2013      | Psychosocial | Contingency Management                                             | Usual Care                                        | 246 | 1 |
| Chopra 2009    | Psychosocial | Medication contingency with community reinforcement approach       | Standard care with counseling                     | 120 | 2 |
| Chutuape 1999  | Psychosocial | Contingency Management                                             | Standard Care                                     | 14  | 3 |
| Chutuape 2001  | Psychosocial | Contingency Management                                             | Weekly draws for take-home doses (not contingent) | 53  | 2 |
| DeFulio 2012   | Psychosocial | Contingency Management in therapeutic workplace                    | Therapeutic workplace                             | 38  | 2 |
| Dunn 2013      | Psychosocial | Employment-based contingency                                       | Prescription for naltrexone                       | 67  | 2 |
| Epstein 2009   | Psychosocial | High/Low Dose Methadone maintenance therapy with vouchers          | High/Low Dose Methadone maintenance therapy       | 252 | 2 |

|              |              |                                                   |                                                   |     |   |
|--------------|--------------|---------------------------------------------------|---------------------------------------------------|-----|---|
| Everly 2011  | Psychosocial | Contingency Management in therapeutic workplace   | Therapeutic workplace                             | 35  | 2 |
| Ghitza 2008  | Psychosocial | Contingency Management                            | Methadone maintenance therapy                     | 116 | 1 |
| Gross 2006   | Psychosocial | Contingency Management for vouchers OR medication | Buprenorphine Maintenance Therapy with counseling | 60  | 2 |
| Hser 2011    | Psychosocial | Incentives                                        | Usual Care                                        | 320 | 2 |
| Iguchi 1997  | Psychosocial | Contingency Management                            | Standard Treatment                                | 103 | 1 |
| Jiang 2012   | Psychosocial | Contingency Management                            | Usual Care                                        | 160 | 2 |
| Katz 2002    | Psychosocial | Vouchers                                          | No Vouchers                                       | 52  | 1 |
| Kidorf 1996  | Psychosocial | Contingency Management                            | Methadone maintenance therapy                     | 16  | 2 |
| Kidorf 2013  | Psychosocial | Reinforced on-site integrated care                | Standard care                                     | 125 | 2 |
| Kosten 2003  | Psychosocial | Contingency Management                            | Buprenorphine                                     | 160 | 2 |
| Ling 2013    | Psychosocial | Contingency Management + Buprenorphine-naloxone   | Buprenorphine-naloxone                            | 202 | 3 |
| Milby 1978   | Psychosocial | Contingency Management                            | Methadone maintenance therapy                     | 75  | 2 |
| Neufeld 2008 | Psychosocial | Contingency Management                            | Methadone maintenance therapy                     | 100 | 1 |
| Oliveto 2005 | Psychosocial | Contingency Management                            | Standard Treatment                                | 140 | 2 |
| Peirce 2006  | Psychosocial | Contingency Management                            | Standard Care                                     | 388 | 2 |

|                   |                     |                                                                                                             |                                                                    |     |   |
|-------------------|---------------------|-------------------------------------------------------------------------------------------------------------|--------------------------------------------------------------------|-----|---|
| Petry 2002        | Psychosocial        | Contingency Management                                                                                      | Standard Treatment                                                 | 42  | 2 |
| Petry 2005        | Psychosocial        | Contingency Management                                                                                      | Methadone maintenance therapy                                      | 77  | 3 |
| Petry 2007        | Psychosocial        | Contingency Management                                                                                      | Methadone maintenance therapy                                      | 74  | 2 |
| Preston 2000      | Psychosocial        | Contingency Management                                                                                      | Methadone maintenance therapy                                      | 120 | 3 |
| Schottenfeld 2005 | Psychosocial        | Contingency Management (with buprenorphine or methadone)                                                    | Methadone maintenance therapy OR Buprenorphine Maintenance Therapy | 162 | 3 |
| Silverman 2004    | Psychosocial        | Contingency Management                                                                                      | Methadone maintenance therapy                                      | 78  | 3 |
| Stitzer 1992      | Psychosocial        | Contingency Management                                                                                      | Methadone maintenance therapy                                      | 53  | 1 |
| Marsch 2014       | Psychosocial        | Web-based education                                                                                         | Standard Counselling                                               | 160 | 1 |
| Bickel 2008       | Psychosocial        | Therapist-delivered community reinforcement approach OR Computer-delivered community reinforcement approach | Standard treatment                                                 | 135 | 2 |
| Bell 2007         | Witnessed Ingestion | Supervised buprenorphine-naloxone (daily, second-daily or thrice-weekly)                                    | Weekly take-home dosing                                            | 119 | 2 |
| Fiellin 2006**    | Witnessed Ingestion | Enhanced medical management + thrice                                                                        | Standard medical management + once                                 | 166 | 3 |

|                |                              |                                                                  |                                           |     |   |
|----------------|------------------------------|------------------------------------------------------------------|-------------------------------------------|-----|---|
|                |                              | weekly buprenorphine-naloxone dispensing                         | weekly buprenorphine-naloxone dispensing  |     |   |
| Holland 2012   | Witnessed Ingestion          | Twice weekly supervised methadone                                | Daily, unsupervised methadone             | 60  | 3 |
| Holland 2014   | Witnessed Ingestion          | Supervised daily buprenorphine-naloxone                          | Unsupervised daily buprenorphine-naloxone | 293 | 3 |
| Rhoades 1998** | Witnessed Ingestion          | Supervised methadone (5 days per week)                           | Supervised methadone (2 days a week)      | 107 | 1 |
| Solhi 2016*    | Comorbidities (Acute Pain)   | Meperidine IV                                                    | Morphine IV                               | 122 | 1 |
| Blondell 2010* | Comorbidities (Chronic Pain) | Buprenorphine-Naloxone Steady Dose                               | Buprenorphine-Naloxone Tapering Dose      | 12  | 3 |
| Wiest 2015*    | Comorbidities (Chronic Pain) | Swedish massage                                                  | Treatment as usual                        | 51  | 2 |
| Neumann 2013*  | Comorbidities (Chronic Pain) | Buprenorphine-Naloxone 4-16 mg/day                               | Methadone 10-60 mg/day                    | 54  | 3 |
| Stein 2012*    | Comorbidities (Insomnia)     | Trazodone                                                        | Placebo                                   | 137 | 4 |
| McRae 2004     | Comorbidities (Anxiety)      | Buspirone                                                        | Placebo                                   | 36  | 5 |
| Levin 2006*    | Comorbidities (ADHD)         | Sustained release methylphenidate or Sustained release bupropion | Placebo                                   | 97  | 4 |

Note: RCTs sufficiently described in systematic review were not included here.

\* Study identified from RCT search.

\*\* Study identified through grey literature search.
